## Dickkopf-1 induces angiogenesis via VEGF receptor 2 regulation independent of the Wnt signaling pathway

Sung Hoon Choi<sup>1,\*</sup>, Hyemi Kim<sup>2,3,\*</sup>, Hyun Gyu Lee<sup>2</sup>, Beom Kyung Kim<sup>4,5</sup>, Jun Yong Park<sup>4,5</sup>, Do Young Kim<sup>4,5</sup>, Sang Hoon Ahn<sup>4,5</sup>, Kwang-Hyub Han<sup>4,5</sup> and Seung Up Kim<sup>4,5</sup>

<sup>1</sup>Division of Bioconvergence Analysis, Drug and Disease Target Group, Korea Basic Science Institute, Daejeon, Korea

<sup>2</sup>Department of Microbiology and Immunology, Institute of Gastroenterology, Yonsei University College of Medicine, Seoul, Korea

<sup>3</sup>Brain Korea 21 Plus Project for Medical Sciences, Institute of Gastroenterology, Yonsei University College of Medicine, Seoul, Korea

<sup>4</sup>Department of Internal Medicine, Institute of Gastroenterology, Yonsei University College of Medicine, Seoul, Korea

<sup>5</sup>Liver Cirrhosis Clinical Research Center, Seoul, Korea

\*These authors contributed equally to this work

**Correspondence to:** Seung Up Kim, **email:** ksukorea@yuhs.ac

**Keywords:** *dickkopf-1*, *angiogenesis*, *HUVEC*, *Hepatocellular carcinoma*, *vascular endothelial growth factor receptor*

**Received:** February 04, 2017

**Accepted:** July 18, 2017

**Published:** August 01, 2017

Copyright: Choi et al. This is an open-access article distributed under the terms of the Creative Commons Attribution License 3.0 (CC BY 3.0), which permits unrestricted use, distribution, and reproduction in any medium, provided the original author and source are credited.

### ABSTRACT

**Tumor angiogenesis is essential for invasive tumor growth and metastasis. Dickkopf-1 (DKK-1), an antagonist of Wnt signaling, participates in tumor development and progression. We evaluated whether DKK-1 stimulation induces angiogenesis and the endothelial–mesenchymal transition (EnMT).**

Human umbilical vein endothelial cells (HUVECs) were stimulated with recombinant DKK-1 (rDDK-1) or conditioned medium from a culture of DKK-1-transfected 293 cells. Following stimulation, the expression levels of angiogenesis-related factors and EnMT related markers were determined by immunoblot assays. In addition, the effects of exogenous DKK-1 on angiogenesis and EnMT were assessed by tube-formation, cell invasion, and wound-healing assays.

Human hepatoma cells, such as Hep3B and Huh-7, showed high levels of DKK-1 expression, whereas 293 cells and HUVECs showed little or no DKK-1 expression. Increased endothelial cell tube formation and invasiveness were observed in HUVECs treated with concentrated conditioned medium from DKK-1-overexpressing 293 cells or rDDK-1. DKK-1-stimulated HUVECs also exhibited increased motility in wound-healing assays. Furthermore, the expression levels of angiogenesis-related factors, including vascular endothelial growth factor receptor 2 and vascular endothelial-cadherin, were increased in DKK-1-stimulated HUVECs. The expression of EnMT markers, such as vimentin and Twist, was also increased in DKK-1-stimulated HUVECs. However, no significant change in  $\beta$ -catenin or GSK3 $\beta$  expression was observed.

Our *in vitro* data suggest that DKK-1 can enhance angiogenesis and EnMT by HUVECs independent of the Wnt signaling pathway. Modulation of DKK-1 expression may facilitate development of novel strategies to control tumor angiogenesis and metastasis.

### INTRODUCTION

Dickkopf-1 (DKK-1) is a potent antagonist of Wnt/ $\beta$ -catenin signaling [1]. DKK-1 acts as an inhibitory ligand of the low-density lipoprotein receptor-related protein 5/6 co-receptors and subsequently blocks their interaction with Wnt, resulting in  $\beta$ -catenin degradation [2]. This inhibitory

role of DKK-1 in Wnt/ $\beta$ -catenin signaling is supported by the downregulation of DKK-1 in human colon cancers and the correlation between high DKK-1 expression and favorable responses to chemotherapy in brain tumors [3]. In contrast, DKK-1 overexpression has been reported in various tumors, including human hepatoblastomas, Wilms' tumors, multiple myelomas, and hormone-resistant breast

cancers [4–6]. In addition, DKK-1 is highly expressed in hepatocellular carcinoma (HCC) [7], which is significantly correlated with poorer pathologic grade and postoperative outcomes [8, 9].

To date, it has been demonstrated that DKK-1 promotes angiogenesis during development, tumorigenesis, and inflammation [10]. DKK-1 enhances the angiogenic properties of human endothelial colony-forming cells, and increases tumoral angiogenesis in breast cancer [11]. In osteoarthritic knee joints, DKK-1 was associated with angiogenesis and cartilage matrix proteinase secretion [12]. In addition, Tung et al. reported that a DKK-1-expressing HCC cell line showed an increased microvessel density around tumors [13], while another study showed that DKK-1-mediated endothelial cell activation led to increased vascular density and vessel diameter in rats [14]. These findings indicate that DKK-1 plays a role in microvascular remodeling and tumor angiogenesis activation, which may account for its promotion of cancer growth *in vivo*.

However, the mechanism underlying the role of DKK-1 in angiogenesis remains to be elucidated. In the present study, DKK-1 expression was determined in mouse HCC tissue and human HCC cell lines. In addition, the effects of DKK-1 on angiogenesis and endothelial-mesenchymal transition (EnMT) were investigated.

## RESULTS

### DKK-1 expression in HCC

DKK-1 expression was high in c-myc-overexpressing HCC mice tissue and in a Xenograft mouse model using the Hep3B cell line (Figures 1A and 1B) [15, 16], compared to the controls. In addition, DKK-1 was expressed in several human HCC cell lines. DKK-1 mRNA, DKK-1 protein, and secreted DKK-1 protein levels (Figure 1C–1E) were high in HepG2, Hep3B, and Huh7 cells but lower in SNU 449 and SNU 475 cells. In contrast, DKK-1 was not expressed in human umbilical vein endothelial cells (HUVECs) or 293 cells (Supplementary Figure 1). All these support that DKK-1 expression is related to HCC development.

### DKK-1 increases motility, invasion, and tube formation

The effect on angiogenesis of DKK-1 stimulation was investigated. Concentrated conditioned medium of DKK-1-expressing 293 cells was first produced (Figure 2A). A high concentration of secreted DKK-1 protein (pDKK-1) was confirmed by Western blot and ELISA (Figure 2A).

DKK-1 stimulation increased the motility, invasion, and tube formation of HUVECs compared to controls, suggesting increased angiogenetic potential (Figure 2B–2D). Treatment with recombinant DKK-1 (rDKK-1) resulted

in concentration-dependent increases in motility, invasion, and tube formation by HUVECs (Supplementary Figure 2). In contrast, DKK-1 did not affect HUVEC proliferation, suggesting that cell proliferation did not influence the results of the motility, invasion, and tube formation assays (Supplementary Figure 3).

### DKK-1 increases EnMT marker expression

To investigate the influence of DKK-1 on EnMT, HUVECs were stimulated by DKK-1. DKK-1 stimulation led to increased N-cadherin, Twist and vimentin expression, and decreased vascular-endothelial (VE)-cadherin expression, compared to the controls (Figure 3A and 3B). rDKK-1 exerted similar effects, in a concentration-dependent manner (Supplementary Figure 4).

### Effect of DKK-1 on gene expression profiles

DKK-1 stimulation using conditioned medium influenced the expression of genes related to angiogenesis and cell morphology (Figure 4A). A protein-protein interaction analysis indicated that the effect of DKK-1 stimulation on the EnMT potential of HUVECs is related to changes in the expression of several genes, including vascular endothelial growth factor receptor 2 (VEGFR2) and N-cadherin (Figure 4B). In contrast, the expression of genes related to cell proliferation and stability was not influenced by DKK-1 stimulation. Treatment with rDKK-1 yielded similar findings (Supplementary Figure 5). In addition to the high expression of VEGFR2 after DKK-1 stimulation, it has been known that VEGFR2 can promote angiogenesis and blockage of VEGFR2 can prohibit cancer invasion. Accordingly, we focused on VEGFR2 in our following experiments.

### DKK-1 induces angiogenesis via the VEGFR2 signaling cascade

The role of the VEGFR2 signaling cascade in DKK-1-induced angiogenesis was next evaluated. Stimulation of HUVECs with DKK-1-conditioned medium resulted in increased expression of VEGFR2 compared to the controls (Figure 5A and 5B). Moreover, treatment with rDKK-1 induced increased expression of VEGFR2 in a concentration-dependent manner (Supplementary Figure 6). In addition, phosphorylation of VEGFR2 downstream molecules (e.g., Akt and Erk) was increased by DKK-1 stimulation (Figure 5C).

Because DKK-1 is an antagonist of the Wnt signaling pathway [10, 11], the expression of genes related to Wnt signaling in DKK-1-stimulated HUVECs was determined. No significant change in  $\beta$ -catenin or GSK3 $\beta$  expression was observed (Figure 5D). This suggests that the effect of DKK-1 stimulation on VEGFR2 expression is independent of the Wnt signaling pathway.

## DISCUSSION

In this study, DKK-1 expression was high in HCC mice tissue and human HCC cell lines, in agreement with previous reports [9, 17], but it was not expressed in HUVECs. In addition, DKK-1 stimulation potentiated angiogenesis—as reflected by increased motility, invasion, and tube formation—by HUVEC cells. This was supported by increases in the expression of EnMT markers, such as N-cadherin, Twist and vimentin, and the decrease in VE-cadherin expression. The increased EnMT potential of DKK-1-stimulated HUVECs was found to be related to the activation of VEGFR2 and its downstream molecules, such as Akt and Erk. Finally, we found no significant change in  $\beta$ -catenin and GSK3 $\beta$  expression, indicating that DKK-1 stimulation influences

angiogenesis by upregulating VEGFR2 expression (Figure 6).

A significant association between DKK-1 and angiogenesis has been reported previously. Tung *et al.* [13] observed that DKK-1-expressing tumors, established by injection of PLC/PRF/5 HCC cells into mice, showed an increased microvessel density score. Moreover, DKK-1 mediates endothelial cell activation by suppressing the Wnt/ $\beta$ -catenin pathway [14]. In this study, using an *in vivo* microvascular remodeling animal model, DKK-1 significantly increased vascular density and vessel diameter in rats. Similarly, Weng *et al.* [12] reported that DKK-1 promoted angiogenesis and cartilaginous degradation by synovial fibroblasts, accelerating synovial angiogenesis and cartilage destruction. Furthermore, DKK-1 treatment increased vessel formation in implanted

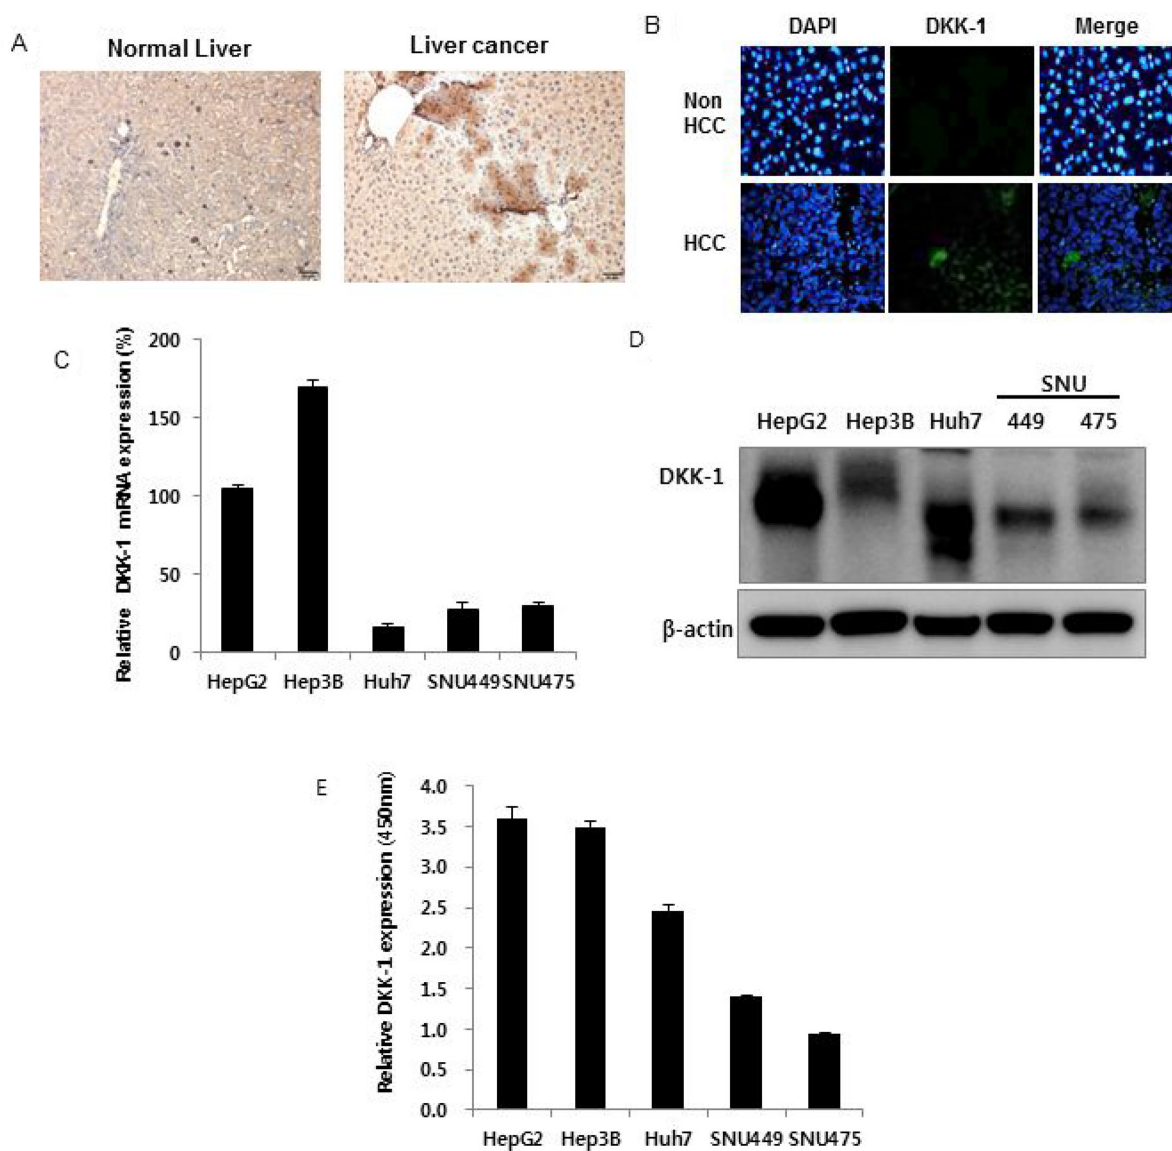

**Figure 1: Dickkopf-1 (DKK-1) expression in hepatocellular carcinoma (HCC).** DKK-1 expression in c-myc-overexpressing HCC mice tissue (A) and xenograft mice using Hep3B cells (B). DKK-1 mRNA (C) protein (D) and secreted protein (E) levels were high in HepG2, Hep3B, and Huh7 cells, but lower in SNU 449 and SNU 475 cells.

Matrigel plugs and xenografted tumors [11]. Taken together, the above findings suggest that DKK-1 plays a role in microvascular remodeling and tumor angiogenesis.

However, conflicting results have also been reported. Inhibition of angiogenesis by DKK-1 was demonstrated due to its mitigation of ocular pathological neovascularization, characterized by excessive Wnt signaling [18]. Recently, it was reported that endothelial-cell-specific overexpression of DKK-1 in mice results in important vessel defects, including reductions in radial

vessel expansion and the number of tip cells and filopodia in the retina [19]. The reasons for these discrepancies regarding the influence of DKK-1 on angiogenesis are unclear. Although further investigations are warranted, differences in the DKK-1 dose, method of DKK-1 manipulation, or functions of DKK-1 under various physiological conditions can be hypothesized.

Most cellular activities regulated by Wnt signaling are related to angiogenesis, particularly endothelial cell proliferation and morphogenesis. The role of Wnt in

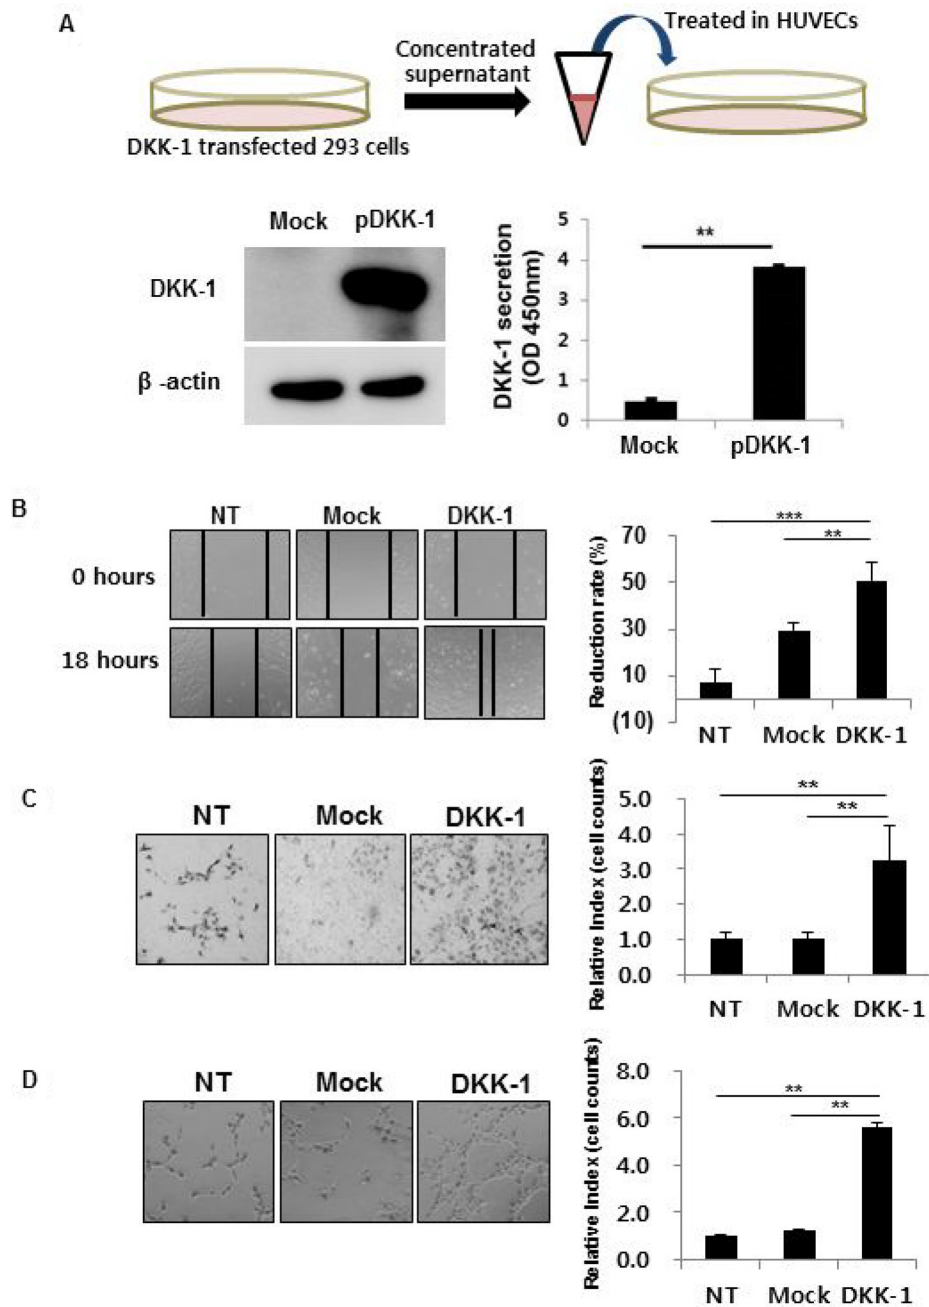

**Figure 2: DKK-1 increases the motility, invasion, and tube formation of human umbilical vein endothelial cells (HUVECs).** DKK-1 conditioned medium was manufactured by transfecting DKK-1 into 293 cells and confirmed by Western blot and ELISA (A). HUVECs cultured in DKK-1-conditioned medium exhibited increased motility (B), invasion (C), and tube formation (D) compared to the controls. NT, non-treated.

vascular development has been confirmed using targeted deletion mutants of Wnt signaling components in animal models [20, 21]. In addition, aberrant activation of Wnt signaling plays an important role in hepatocarcinogenesis. Consistently, inhibition of Wnt signaling exerted potent anti-HCC activity by increasing the rate of apoptosis of tumor cells and impairing tumor vascularization [22]. Given this role of Wnt signaling in vascular development, angiogenesis, and hepatocarcinogenesis, DKK-1 may be a good target for treating hypervascular tumors (such as HCC) by modulating angiogenesis. In contrast to low or no DKK-1 expression in normal cells or tissue as shown in this study, several HCC cell lines had high DKK-1 expression, and the serum level of DKK-1 in HCC patients is significantly associated with HCC staging, HCC recurrence after curative resection, and poor prognosis [9, 17]. These phenomena can indicate the DKK-1-mediated promotion of cancer growth by activation of tumor angiogenesis and support the rationale that DKK-1 can be a cancer-specific therapeutic target for HCC treatments. Indeed, sorafenib, the only approved molecular-targeted agent, which can suppress angiogenesis and tumor growth by inhibiting the Raf/MEK/ERK signaling pathway and receptor tyrosine kinases [23], prolongs the survival of patients with HCC. Interestingly, we found that the stimulation of HUVEC cells using the decreased concentration of DKK-1 in culture media by

si-DKK1 treatment, led to the decreased expression of VEGFR2 (Supplementary Figure 7). This phenomenon can raise the necessities for further *in-vivo* studies which can provide the evidences that simultaneous suppression of VEGFR2 by blocking DKK-1 and sorafenib treatment can have synergistic effects on HCC treatment.

In our study, VEGFR2 expression was increased, and its downstream molecules—such as Akt and Erk—showed increased phosphorylation after DKK-1 stimulation. VEGFR2 is a receptor tyrosine kinase expressed predominantly in endothelial cells [24]. Activation of VEGFR2 can initiate multiple signaling pathways that orchestrate a variety of complex biological effects, such as endothelial cell maturation, vessel lumen formation, vascular permeability, vasodilation, angiogenesis, and arteriogenesis [25]. Thus, it can be hypothesized that high DKK-1 expression results in activation of VEGFR2 expression and increased sensitivity to VEGF in endothelial cells, which is significantly correlated with DKK-1 expression [26], during coordination of angiogenesis. The above results provide a rationale to support targeting of VEGFR2 using sorafenib, and show the potential of DKK-1 as a target of therapy [27]. Indeed, an anti-DKK-1 antibody suppressed HCC progression in a xenograft mouse model [13].

DKK-1 binds to the Wnt co-receptor LRP5/6, which inhibits the formation of a ternary receptor complex, resulting in blockade of  $\beta$ -catenin signaling [28]. In addition

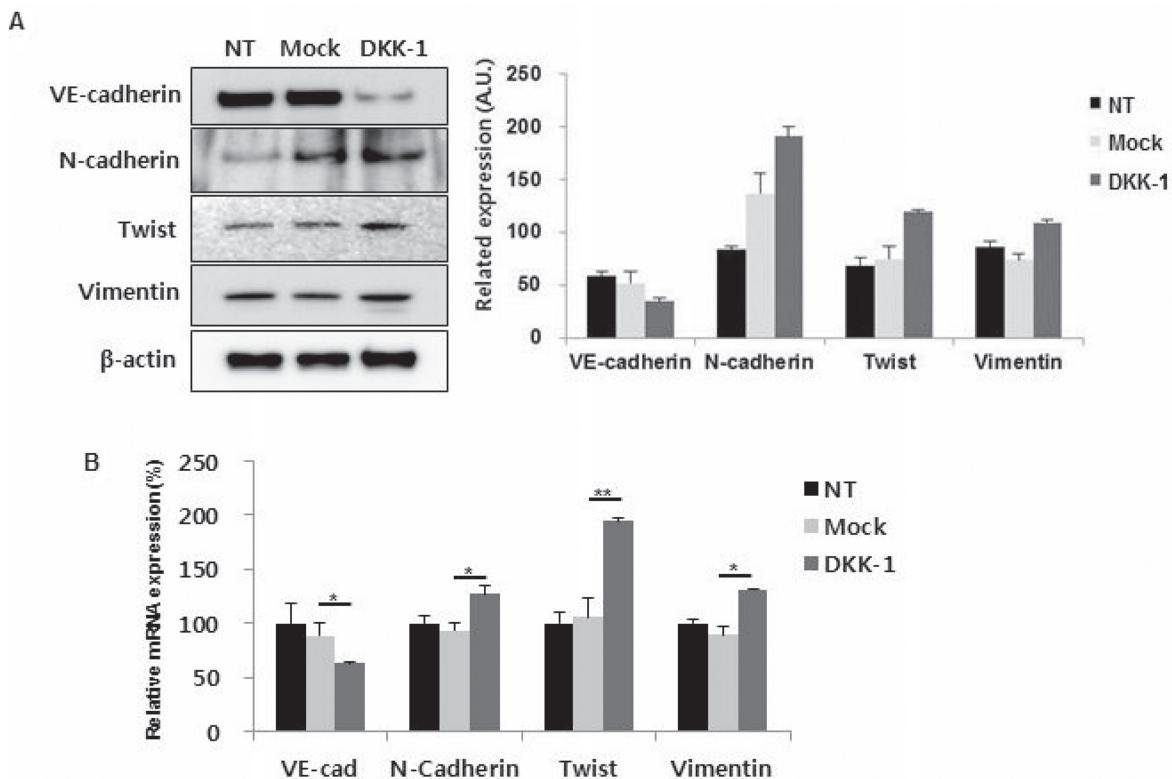

**Figure 3: DKK-1 increases the expression of endothelial-mesenchymal transition (EnMT) markers in HUVECs.** DKK-1 stimulation resulted in increased N-cadherin, twist, and vimentin expression, and decreased VE-cadherin expression, compared to the controls by western blot (A) and mRNA level (B). NT, non-treated.

to LRP5/6, DKK-1 also binds to Kremen (Krm)-1/2 with high affinity to inhibit Wnt/ $\beta$ -catenin signaling [2]. However, in our study, no significant changes in  $\beta$ -catenin and GSK3 $\beta$ , the components of Wnt signaling, were observed. Although we did not identify the receptor for DKK-1 that mediates its influence on angiogenesis, our finding suggests that DKK-1 activates angiogenesis independently of the Wnt signaling

pathway. A recent study reported that carbonic anhydrase IX (CA9), which modulates tumor-associated cell migration and invasion, interacts with DKK-1 [29]. Therefore, further work is required to identify the receptors or molecules associated with this role of DKK-1.

To date, the influence of DKK-1 on various cancer types has been controversial: DKK-1 was down-regulated

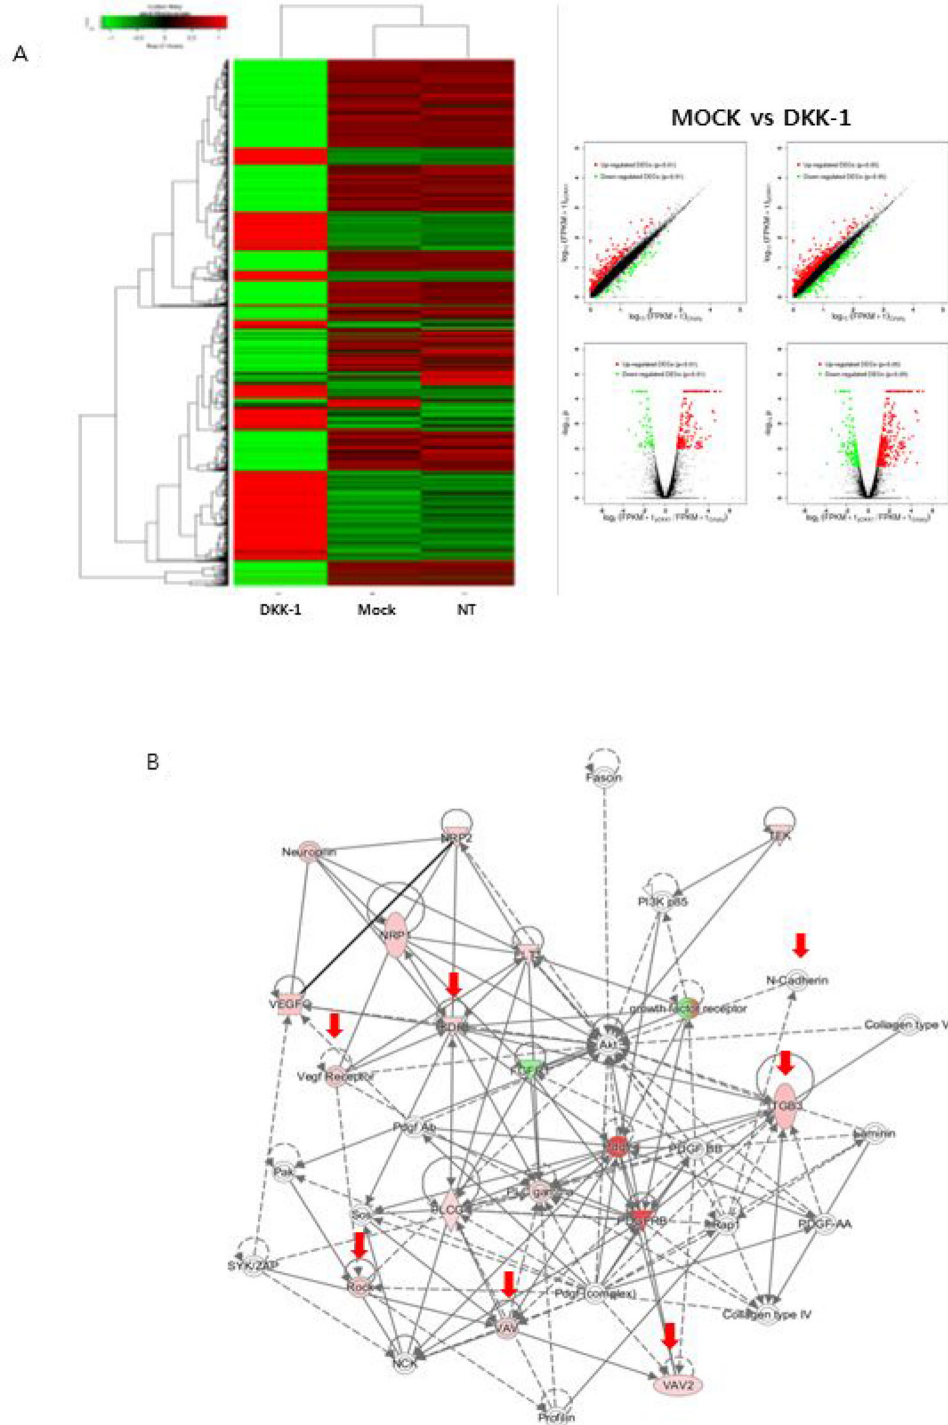

**Figure 4: Effect of DKK-1 on gene expression.** DKK-1 stimulation influenced the expression of genes related to angiogenesis and cell morphology (A). A protein-protein interaction analysis indicated that VEGFR2 and N-cadherin are involved in the DKK1mediated enhancement of the EnMT potential of HUVECs (B).

in colon cancer [30, 31], whereas its expression is high in hepatoblastomas, Wilms' tumor, and multiple myeloma [32, 33]. Because we investigated the association between HCC and angiogenesis in this study, we could not provide evidences to explain the reason why DKK-1 acts differently in various cancer types. Although we believe that the tumor heterogeneity among different cancers, even in the same tumor [34, 35], and the different experimental designs with different experimental materials among the

previous studies might be related to these discordant results in part, further well-designed studies are warranted to elucidate this issue.

In conclusion, although the mechanisms of action of secreted DKK-1, and its physiological relevance to angiogenesis, are not fully understood, our data show that DKK-1 can induce angiogenesis by regulating VEGFR2 independent of the Wnt signaling pathway, and suggest that DKK-1 is a potential therapeutic target.

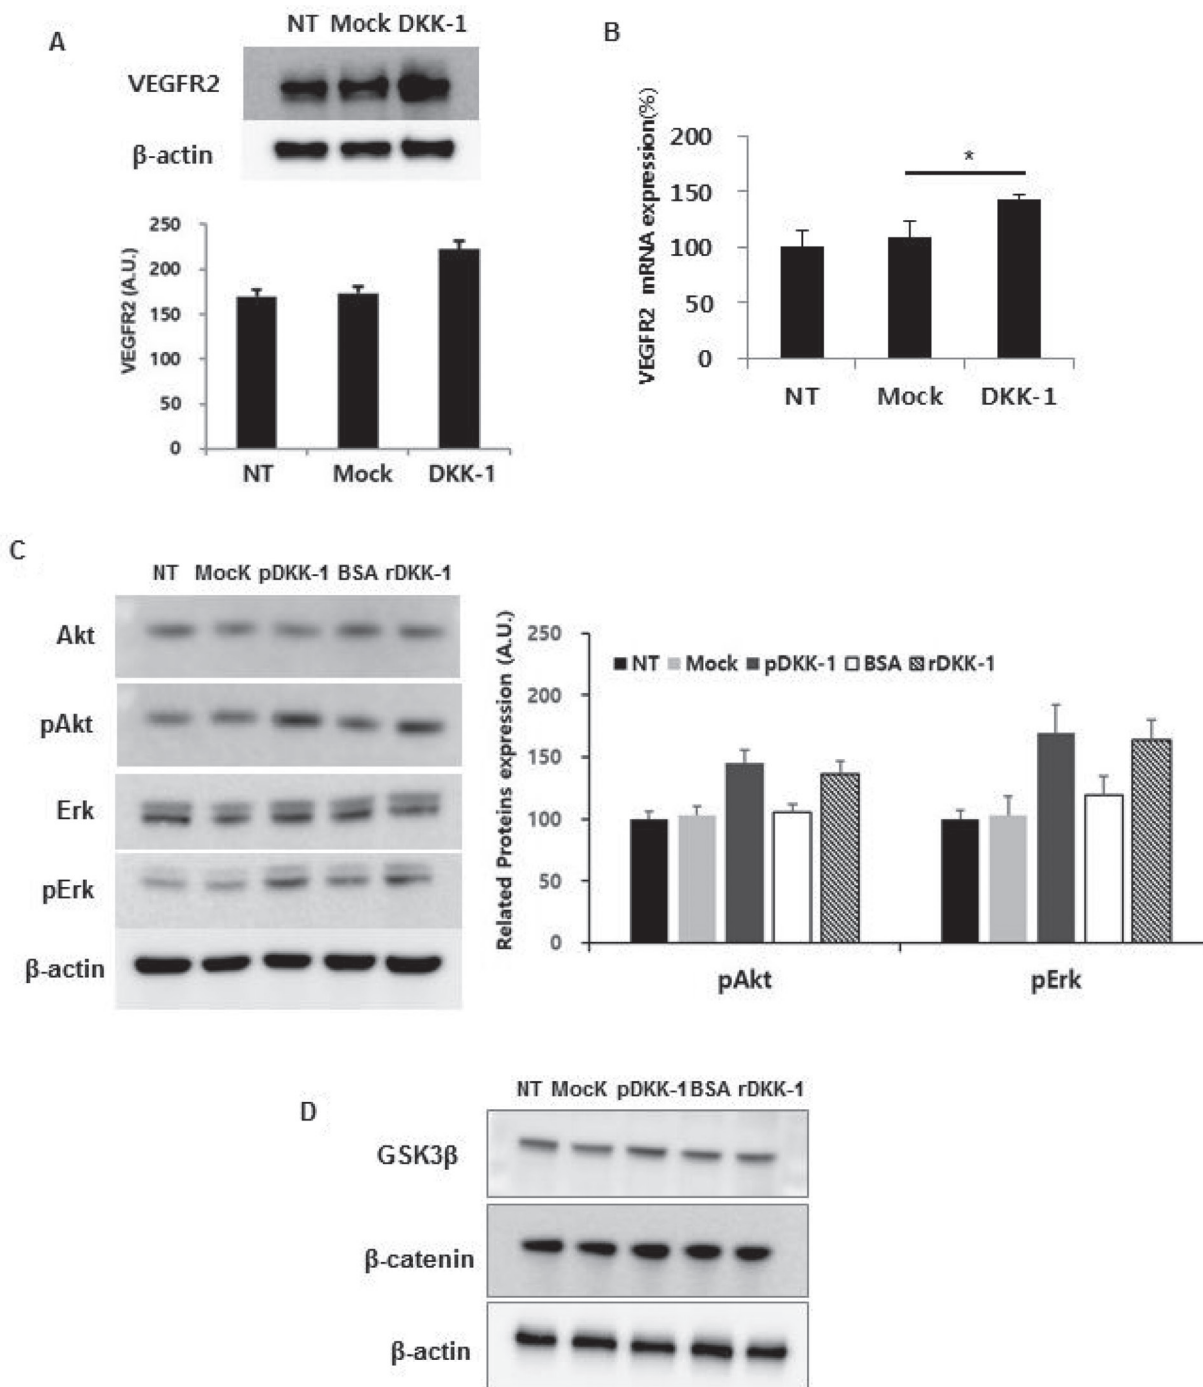

**Figure 5: DKK-1 induces angiogenesis via the VEGFR2 signaling cascade.** Treatment of HUVECs with DKK-1 conditioned medium resulted in increased expression of VEGFR2, and phosphorylation of downstream molecules such as Akt and Erk, compared to the controls (A–C). However, β-catenin and GSK3β expression was unaffected (D).

## MATERIALS AND METHODS

### Cell culture and transfection

Huh-7 (KCLB60104, Korean Cell Line Bank), Hep3B, HepG2 (KCLB88065, Korean Cell Line Bank), SNU449, and SNU475 cells were cultured at 37°C with 5% CO<sub>2</sub> in Dulbecco's modified Eagle's medium (DMEM; Gibco, Grand Island, NY, USA), modified Eagle's Medium (MEM; Gibco), or RPMI-1640 (Gibco) supplemented with 10% fetal bovine serum (FBS; Gibco). SNU449 and SNU475 cells were derived from a primary HCC taken from a Korean patient, The 293 cells were cultured at 37°C with 5% CO<sub>2</sub> in DMEM. HUVECs were cultured at 37°C with 5% CO<sub>2</sub> in EGM-2 Bullet Kit (Lonza, Walkersville, MD, USA). Cells were transfected with pcDNA3-DKK-1 (pDKK-1) using Fugene HD transfection agent (Promega, Madison, WI, USA) according to the manufacturer's instructions.

After transfection, the cells were incubated for 6 h and transferred to fresh culture medium.

### Cell growth assay

HCC cell growth rates were measured using the 3-(4,5-dimethylthiazol-2-yl)-2,5-diphenyltetrazolium bromide (MTT; Amresco, Solon, OH, USA) method. First, cells were seeded in a 96-well plate at  $5 \times 10^3$  cells/well and incubated at 37°C for 24 h in serum-free medium. Then, cells were transfected with pDKK-1 or rDKK-1 as described above. After cultivation for 24 h, cells were transferred to culture medium containing 10% FBS. MTT was added to the wells, and the plates were incubated at 37°C for 3–4 hours to allow dye to penetrate the cells. The medium was removed and treated with dimethylsulfoxide (Sigma-Aldrich, St Louis, MO, USA) for 5 min at room temperature; its absorbance at 595 nm was analyzed using a spectrophotometer (Molecular Devices, Sunnyvale, CA, USA).

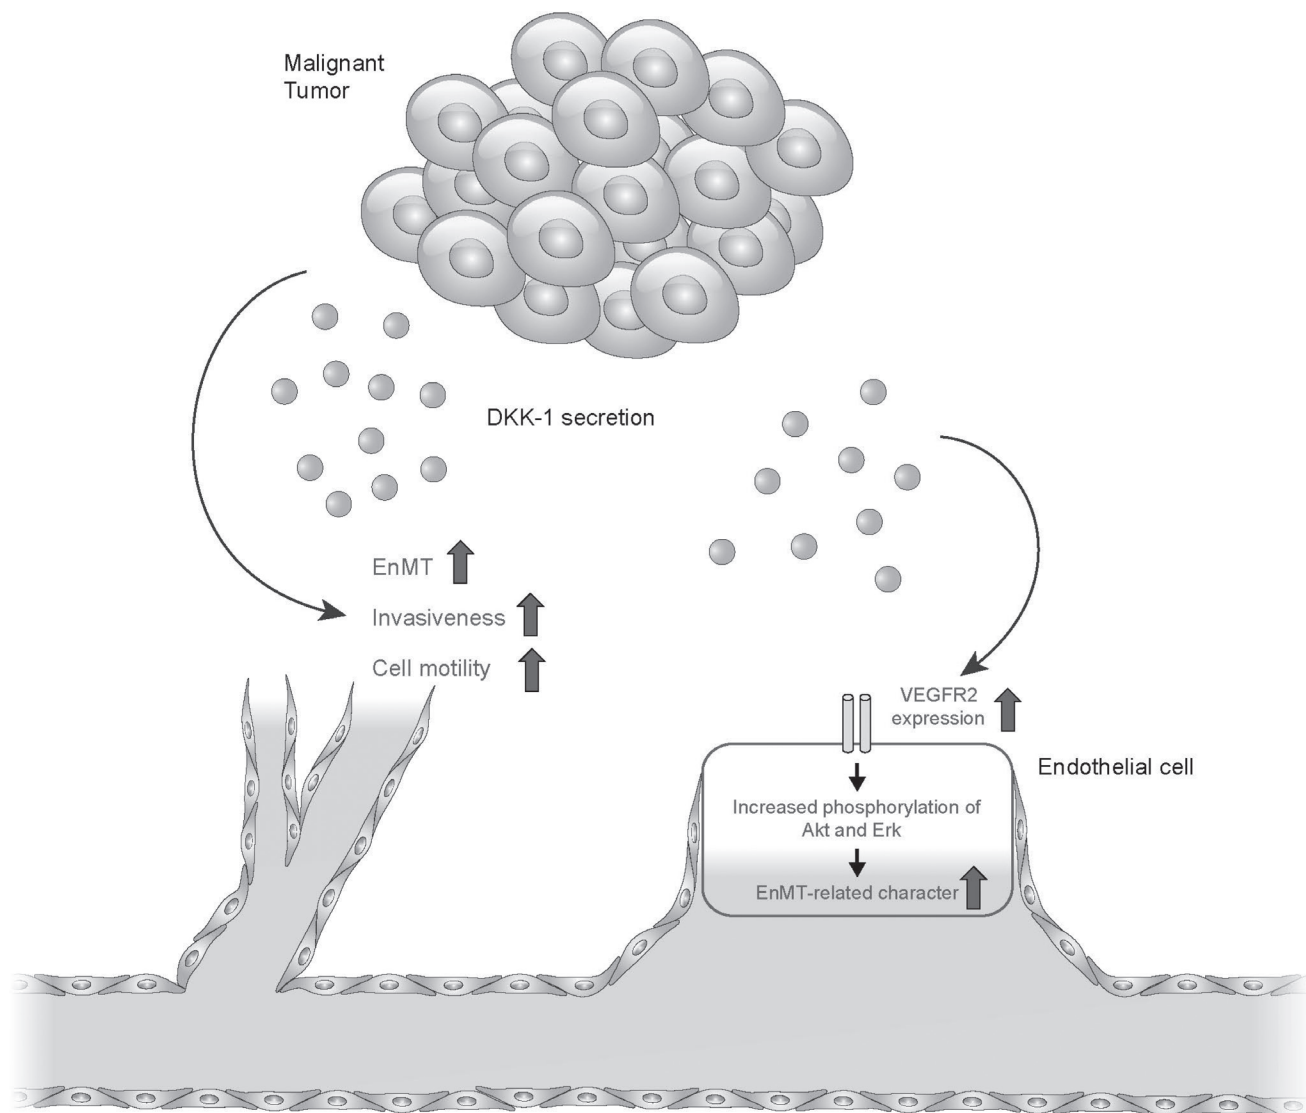

Figure 6: Conclusive figure summarizing the results.



## mRNA isolation and real-time RT-PCR

RNA was extracted using a QIAGEN RNeasy mini kit (QIAGEN, Hilden, Germany) according to the manufacturer's instructions and reverse-transcribed (RT) using a Clontech RT Kit (Clontech, Mountain View, CA, USA). qPCR analysis was performed using SYBR Green Master Mix (Applied Biosystems, Foster City, CA, USA) and specific PCR primers (Supplementary Table 1). Amplification efficiencies were calculated for all primers using serial dilutions of pooled cDNA samples. The data were calculated, using the comparative ( $\Delta\Delta C_t$ ) method, as the expression ratio to  $\beta$ -actin, the housekeeping gene. Data are shown as means  $\pm$  standard error of the mean (SEM) of at least three independent experiments.

## Immunoblot analysis

The proteins were separated according to their molecular weight via sodium dodecyl sulfate-polyacrylamide gel electrophoresis (SDS-PAGE), transferred to a PVDF membrane (GE Healthcare, Amersham, UK), and probed with mouse monoclonal antibodies or rabbit polyclonal antibodies specific for the proteins of interest. The blots were developed using the enhanced chemiluminescence (ECL) technique (PerkinElmer, Boston, MA, USA) according to the manufacturer's instructions, and the level of each protein was quantified and compared (DKK-1, VE-cadherin and Vimentin: Abcam, Cambridge, UK; VEGFR2,  $\beta$ -actin, AKT, pAkt, ERK, pERK, GSK3b and N-cadherin: Cell Signaling, Danvers, MA, USA; Twist: Millipore, Billerica CA, USA). To detect secreted DKK-1, an enzyme-linked immunosorbent assay (ELISA; R&D Systems, Minneapolis, MN, USA) was performed according to the manufacturer's instructions.

## Angiogenesis assay

HUVEC invasiveness was assessed *in vitro* using a transwell chamber (Corning Costar, Cambridge, MA, USA). Then,  $3 \times 10^4$  HUVECs/well and treated rDKK-1 or conditioned medium of DKK-1-overexpressing 293 cells was transferred to each transwell chamber. Following incubation for 24 h, invading cells were stained with hematoxylin and eosin. The total number of invaded cells on the lower side of the filter was determined using a light microscope (Olympus America, Melville, NY, USA) at  $40\times$  magnification.

Tube formation by HUVECs was measured in Matrigel (BD Biosciences, San Jose, CA, USA). A 48-well plate (BD Falcon, Bedford, MA, USA) was coated with 50  $\mu$ l Matrigel (10 mg/mL) and plated with HUVECs ( $7 \times 10^4$ /well); rDKK-1 or conditioned medium of DKK1overexpressing 293 cells was then added. The plates were incubated for 2.5 h, and tube formation was observed under a light microscope.

The migratory activity of DKK-1-stimulated HUVECs was assessed by migration assay. Cells were seeded at a density of  $5 \times 10^4$  cells/well onto 12-well plates and incubated for 24 h. A linear wound was made by scratching the monolayer with a sterile (white) pipette tip. After washing, cells were treated with 1 mL serum-free medium (control), rDKK-1 or conditioned medium of DKK-1-overexpressing 293 cells. Wound areas were photographed using an Olympus microscope (Olympus Optical Co., Tokyo, Japan).

## mRNA sequencing and genome mapping of sequence reads

Isolated total RNA was used to prepare an mRNA sequencing library using the Illumina TruSeq Stranded mRNA Sample Preparation kit (Illumina, San Diego, CA, USA) according to the manufacturer's protocol to generate single 8 bp indices for multiplexing. Library quality and size were assessed using an Agilent 2100 Bioanalyzer DNA kit (Agilent, Palo Alto, CA, USA). Potentially existing sequencing adapters and low-quality bases in the raw reads were trimmed using Cutadapt software. The cleaned high-quality reads were mapped to the human reference genome hg19 of the UCSC genome (<https://genome.ucsc.edu>) using TopHat2 software [36]. The sequencing libraries were prepared in a strand-specific manner using the Illumina strand-specific library preparation kit during mapping. To quantify the mapped reads on the human reference genome in terms of gene expression values, Cufflinks software with the strand-specific library option was used [37]. Gene annotation for the human reference genome hg19 in GTF format was used to quantify gene expression. Gene expression values were calculated in fragments per kilobase of transcript per million fragments mapped (FPKM). Differentially expressed genes between two biological conditions were analyzed using the Cuffdiff software in the Cufflinks package [37].

## Statistical analysis

Results were expressed as means  $\pm$  SEM or frequencies (%). An independent *t*-test was performed to compare means between the control and experimental groups. All statistical analyses were performed using SPSS software (ver. 12.0; SPSS Inc., Chicago, IL, USA). A *p*-value of  $< 0.05$  was considered to indicate statistical significance.

## Abbreviations

DKK-1, dickkopf-1; HCC, hepatocellular carcinoma; EnMT, endothelial-mesenchymal transition; HUVECs, human umbilical vein endothelial cells; pDKK-1, pcDNA3-DKK-1; rDKK-1, recombinant DKK-1; pDKK-1,

a high concentration of secreted DKK-1 protein; VEGFR2, vascular endothelial growth factor receptor 2.

## Author contributions

*Conception and design:* S.U. Kim; *Development of methodology:* S.U. Kim, SH, Choi, H. Kim, H.K. Lee; *Experiment, analysis, and interpretation of data:* S.H. Choi, H. Kim, H.G. Lee, S.U. Kim; *Writing, review, and/or revision of the manuscript:* S.H. Kim, H. Kim, H.G. Lee, B.K. Kim, J.Y. Park, D.Y. Kim, S.H. Ahn, K.H. Han, S.U. Kim; *Administrative, technical, or material support:* S.U. Kim; *Study supervision:* S.U. Kim.

## CONFLICTS OF INTEREST

Authors have nothing to disclose.

## GRANT SUPPORT

This study was supported by Basic Science Research Program through the National Research Foundation of Korea funded by the Ministry of Science, ICT & Future Planning (2014R1A1A1008585 and 2016R1A1A1A05005138) and by Research of Korea Centers for Disease Control and Prevention (HD15A0351). The funders had no role in study design, data collection and analysis, decision to publish, or preparation of the manuscript.

## REFERENCES

1. Glinka A, Wu W, Delius H, Monaghan AP, Blumenstock C, Niehrs C. Dickkopf-1 is a member of a new family of secreted proteins and functions in head induction. *Nature*. 1998; 391:357–362.
2. Mao B, Wu W, Davidson G, Marhold J, Li M, Mechler BM, Delius H, Hoppe D, Stannek P, Walter C, Glinka A, Niehrs C. Kremen proteins are Dickkopf receptors that regulate Wnt/beta-catenin signalling. *Nature*. 2002; 417:664–667.
3. González-Sancho JM, Aguilera O, García JM, Pendás-Franco N, Peña C, Cal S, García de Herreros A, Bonilla F, Muñoz A. The Wnt antagonist DICKKOPF-1 gene is a downstream target of beta-catenin/TCF and is downregulated in human colon cancer. *Oncogene*. 2005; 24:1098–1103.
4. Wirths O, Waha A, Weggen S, Schirmacher P, Kühne T, Goodyer CG, Albrecht S, Von Schweinitz D, Pietsch T. Overexpression of human Dickkopf-1, an antagonist of wingless/WNT signaling, in human hepatoblastomas and Wilms' tumors. *Lab Invest*. 2003; 83:429–434.
5. Tian E, Zhan F, Walker R, Rasmussen E, Ma Y, Barlogie B, Shaughnessy JD Jr. The role of the Wnt-signaling antagonist DKK1 in the development of osteolytic lesions in multiple myeloma. *N Engl J Med*. 2003; 349:2483–2494.
6. Forget MA, Turcotte S, Beauseigle D, Godin-Ethier J, Pelletier S, Martin J, Tanguay S, Lapointe R. The Wnt pathway regulator DKK1 is preferentially expressed in hormone-resistant breast tumours and in some common cancer types. *Br J Cancer*. 2007; 96:646–653.
7. Patil MA, Chua MS, Pan KH, Lin R, Lih CJ, Cheung ST, Ho C, Li R, Fan ST, Cohen SN, Chen X, So S. An integrated data analysis approach to characterize genes highly expressed in hepatocellular carcinoma. *Oncogene*. 2005; 24:3737–2747.
8. Lee JD, Yun M, Lee JM, Choi Y, Choi YH, Kim JS, Kim SJ, Kim KS, Yang WI, Park YN, Han KH, Lee WJ, Yoo N, et al. Analysis of gene expression profiles of hepatocellular carcinomas with regard to 18F-fluorodeoxyglucose uptake pattern on positron emission tomography. *Eur J Nucl Med Mol Imaging*. 2004; 31:1621–1630.
9. Yu B, Yang X, Xu Y, Yao G, Shu H, Lin B, Hood L, Wang H, Yang S, Gu J, Fan J, Qin W. Elevated expression of DKK1 is associated with cytoplasmic/nuclear beta-catenin accumulation and poor prognosis in hepatocellular carcinomas. *J Hepatol*. 2009; 50:948–957.
10. Mazon M, Masi D, Carreau M. Modulating Dickkopf-1: A Strategy to Monitor or Treat Cancer? *Cancers (Basel)*. 2016; 8.
11. Smadja DM, d'Audigier C, Weiswald LB, Badoual C, Dangles-Marie V, Mauge L, Evrard S, Laurendeau I, Lallemand F, Germain S, Grelac F, Dizier B, Vidaud M, et al. The Wnt antagonist Dickkopf-1 increases endothelial progenitor cell angiogenic potential. *Arterioscler Thromb Vasc Biol*. 2010; 30:2544–2452.
12. Weng LH, Ko JY, Wang CJ, Sun YC, Wang FS. Dkk-1 promotes angiogenic responses and cartilage matrix proteinase secretion in synovial fibroblasts from osteoarthritic joints. *Arthritis Rheum*. 2013; 64:3267–3277.
13. Tung EK, Mak CK, Fatima S, Lo RC, Zhao H, Zhang C, Dai H, Poon RT, Yuen MF, Lai CL, Li JJ, Luk JM, Ng IO. Clinicopathological and prognostic significance of serum and tissue Dickkopf-1 levels in human hepatocellular carcinoma. *Liver Int*. 2011; 31:1494–1504.
14. Glaw JT, Skalak TC, Peirce SM. Inhibition of canonical Wnt signaling increases microvascular hemorrhaging and venular remodeling in adult rats. *Microcirculation*. 2010; 17:348–357.
15. Ju HL, Ahn SH, Kim DY, Baek S, Chung SI, Seong J, Han KH, Ro SW. Investigation of oncogenic cooperation in simple liver-specific transgenic mouse models using noninvasive *in vivo* imaging. *PLoS One*. 2013; 8:e59869.
16. Choi SH, Kwon OJ, Park JY, Kim DY, Ahn SH, Kim SU, Ro SW, Kim KS, Park JH, Kim S, Yun CO, Han KH. Inhibition of tumour angiogenesis and growth by small hairpin HIF-1 $\alpha$  and IL-8 in hepatocellular carcinoma. *Liver Int*. 2014; 34:632–642.
17. Kim SU, Park JH, Kim HS, Lee JM, Lee HG, Kim H, Choi SH, Baek S, Kim BK, Park JY, Kim DY, Ahn SH, Lee JD, et al. Serum Dickkopf-1 as a Biomarker for the Diagnosis of

- Hepatocellular Carcinoma. *Yonsei Med J.* 2015; 56:1296–1306.
18. Chen Y, Hu Y, Lu K, Flannery JG, Ma JX. Very low density lipoprotein receptor, a negative regulator of the wnt signaling pathway and choroidal neovascularization. *J Biol Chem.* 2007; 282:34420–34428.
  19. Min JK, Park H, Choi HJ, Kim Y, Pyun BJ, Agrawal V, Song BW, Jeon J, Maeng YS, Rho SS, Shim S, Chai JH, Koo BK, et al. The WNT antagonist Dickkopf2 promotes angiogenesis in rodent and human endothelial cells. *J Clin Invest.* 2011; 121:1882–1893.
  20. Shu W, Jiang YQ, Lu MM, Morrissey EE. Wnt7b regulates mesenchymal proliferation and vascular development in the lung. *Development.* 2002; 129:4831–4842.
  21. Lobov IB, Rao S, Carroll TJ, Vallance JE, Ito M, Ondr JK, Kurup S, Glass DA, Patel MS, Shu W, Morrissey EE, McMahon AP, Karsenty G, et al. WNT7b mediates macrophage-induced programmed cell death in patterning of the vasculature. *Nature.* 2005; 437:417–421.
  22. Hu J, Dong A, Fernandez-Ruiz V, Shan J, Kawa M, Martínez-Ansó E, Prieto J, Qian C. Blockade of Wnt signaling inhibits angiogenesis and tumor growth in hepatocellular carcinoma. *Cancer Res.* 2009; 69:6951–6959.
  23. Liu L, Cao Y, Chen C, Zhang X, McNabola A, Wilkie D, Wilhelm S, Lynch M, Carter C. Sorafenib blocks the RAF/MEK/ERK pathway, inhibits tumor angiogenesis, and induces tumor cell apoptosis in hepatocellular carcinoma model PLC/PRF/5. *Cancer Res.* 2006; 66:11851–11858.
  24. Oelrichs RB, Reid HH, Bernard O, Ziemiecki A, Wilks AF. NYK/FLK-1: a putative receptor protein tyrosine kinase isolated from E10 embryonic neuroepithelium is expressed in endothelial cells of the developing embryo. *Oncogene.* 1993; 8:11–18.
  25. Weis SM, Cheresh DA. Pathophysiological consequences of VEGF-induced vascular permeability. *Nature.* 2005; 437:497–504.
  26. Jiang SJ, Li W, Li YJ, Fang W, Long X. Dickkopf-related protein 1 induces angiogenesis by upregulating vascular endothelial growth factor in the synovial fibroblasts of patients with temporomandibular joint disorders. *Mol Med Rep.* 2015; 12:4959–5966.
  27. Kim DY, Kim HJ, Han KH, Han SY, Heo J, Woo HY, Um SH, Kim YH, Kweon YO, Lim HY, Yoon JH, Lee WS, Lee BS, et al. Real-Life Experience of Sorafenib Treatment for Hepatocellular Carcinoma in Korea: From GIDEON Data. *Cancer Res Treat.* 2016; 48:1243–1252.
  28. Mao B, Wu W, Li Y, Hoppe D, Stanek P, Glinka A, Niehrs C. LDL-receptor-related protein 6 is a receptor for Dickkopf proteins. *Nature.* 2001; 411:321–325.
  29. Kim BR, Shin HJ, Kim JY, Byun HJ, Lee JH, Sung YK, Rho SB. Dickkopf-1 (DKK-1) interrupts FAK/PI3K/mTOR pathway by interaction of carbonic anhydrase IX (CA9) in tumorigenesis. *Cell Signal.* 2012; 24:1406–1413.
  30. González-Sancho JM, Aguilera O, García JM, Pendás-Franco N, Peña C, Cal S, García de Herreros A, Bonilla F, Muñoz A. The Wnt antagonist DICKKOPF-1 gene is a downstream target of beta-catenin/TCF and is downregulated in human colon cancer. *Oncogene.* 2005; 24:1098–103.
  31. Shou J, Ali-Osman F, Multani AS, Pathak S, Fedi P, Srivenugopal KS. Human Dkk-1, a gene encoding a Wnt antagonist, responds to DNA damage and its overexpression sensitizes brain tumor cells to apoptosis following alkylation damage of DNA. *Oncogene.* 2002; 21:878–89.
  32. Wirths O, Waha A, Weggen S, Schirmacher P, Kühne T, Goodyer CG, Albrecht S, Von Schweinitz D, Pietsch T. Overexpression of human Dickkopf-1, an antagonist of wingless/WNT signaling, in human hepatoblastomas and Wilms' tumors. *Lab Invest.* 2003; 83:429–34.
  33. Tian E, Zhan F, Walker R, Rasmussen E, Ma Y, Barlogie B, Shaughnessy JD Jr. The role of the Wnt-signaling antagonist DKK1 in the development of osteolytic lesions in multiple myeloma. *N Engl J Med* 2003; 349:2483–94.
  34. Peitzsch C, Tyutyunnykova A, Pantel K, Dubrovskaya A. Cancer stem cells: the root of tumor recurrence and metastasis. *Semin Cancer Biol.* 2017; 44:10–24. <https://doi.org/10.1016/j.semcancer.2017.02.011>.
  35. Prasetyanti PR, Medema JP. Intra-tumor heterogeneity from a cancer stem cell perspective. *Mol Cancer.* 2017; 16:41. <https://doi.org/10.1186/s12943-017-0600-4>.
  36. Kim D, Pertea G, Trapnell C, Pimentel H, Kelley R, Salzberg SL. TopHat2: accurate alignment of transcriptomes in the presence of insertions, deletions and gene fusions. *Genome Biol.* 2013; 14:R36.
  37. Langmead B, Salzberg SL. Fast gapped-read alignment with Bowtie 2. *Nature Methods.* 2012; 9:357–359.
